# Supplementary material for: One-step preparation of silica microspheres with super-stable ultralong room temperature phosphorescence
Source: Royal Society of Chemistry journal article supplement (doi:10.1039/c9tc02353d), 2019-01-01
Supplement: c9tc02353d5.pdf [file c9tc02353d5.pdf]

## Supporting Information

### **One-Step Preparation of Silica Microspheres with Super-stable Ultralong Room Temperature Phosphorescence**

Guoqiang Tang<sup>a</sup>, Kai Zhang<sup>a\*</sup>, Tanglue Feng<sup>a</sup>, Songyuan Tao<sup>a</sup>, Mei Han<sup>a</sup>,  
Rui Li<sup>a</sup>, Congcong Wang<sup>a</sup>, Yao Wang<sup>b</sup> and Bai Yang<sup>a</sup>

- a. State Key Laboratory of Supramolecular Structure and Materials, College of Chemistry, Jilin University, Changchun, 130012, P. R. China.
- b. Guangdong Provincial Key Laboratory of Optical Information Materials and Technology, South China Academy of Advanced Optoelectronics, South China Normal University, Guangzhou 510006, P. R. China.

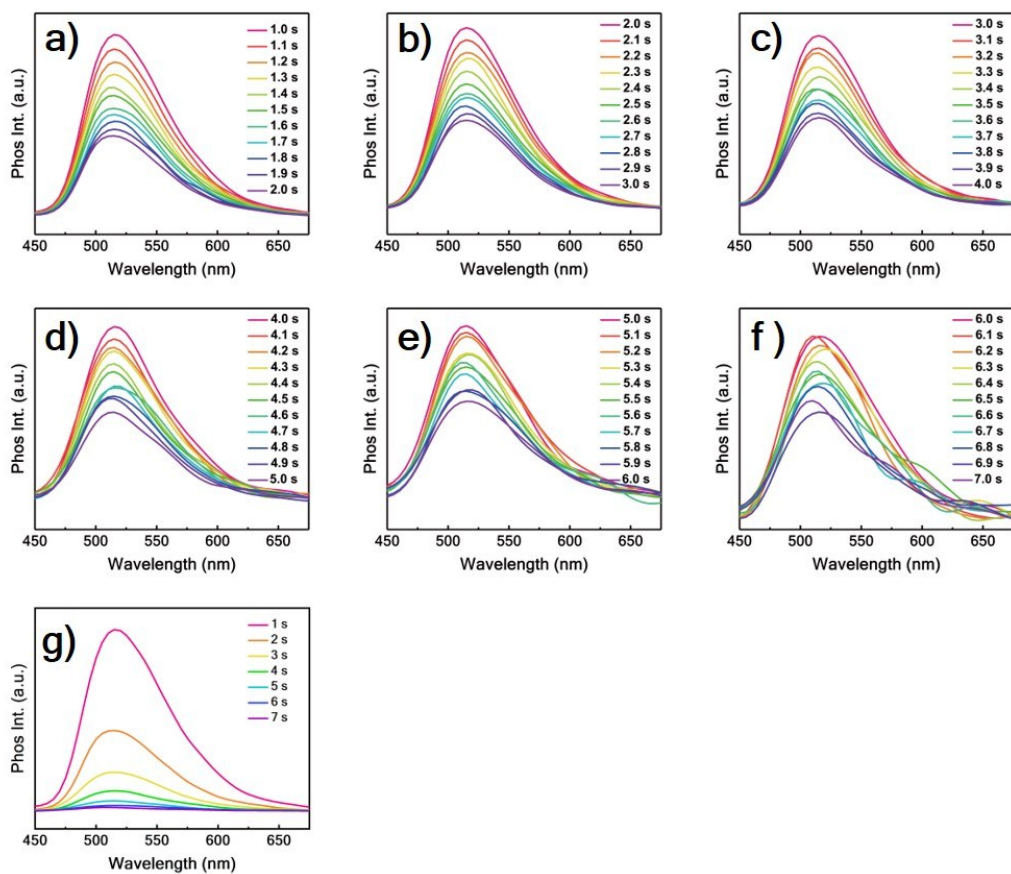

**Figure S1.** Time-resolved PL spectra of CPDs/SiO<sub>2</sub> (1.0 s-7.0 s).

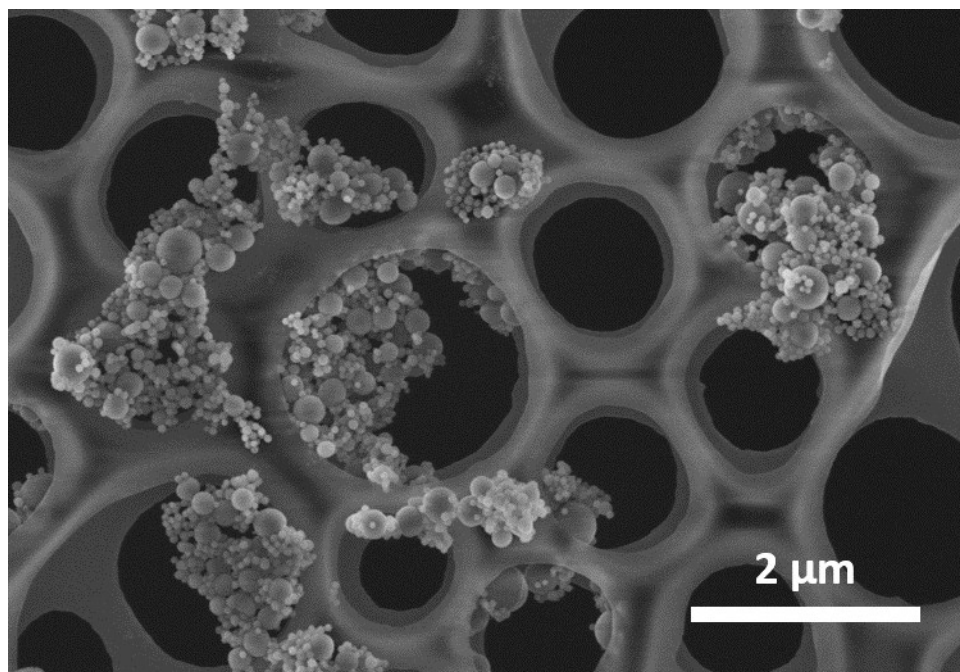

**Figure S2.** SEM image of CPDs/SiO<sub>2</sub> Ms on a lacey support film as grids.

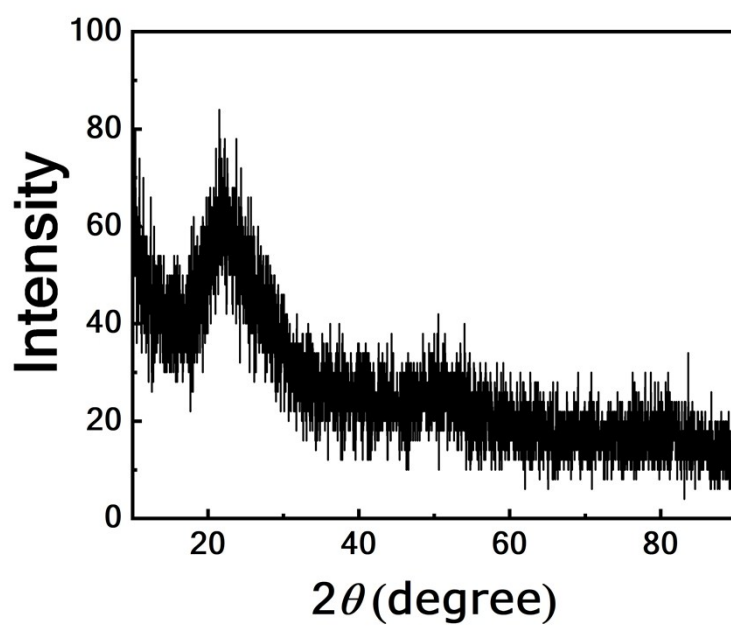

**Figure S3.** XRD patterns of CPDs/SiO<sub>2</sub> Ms.

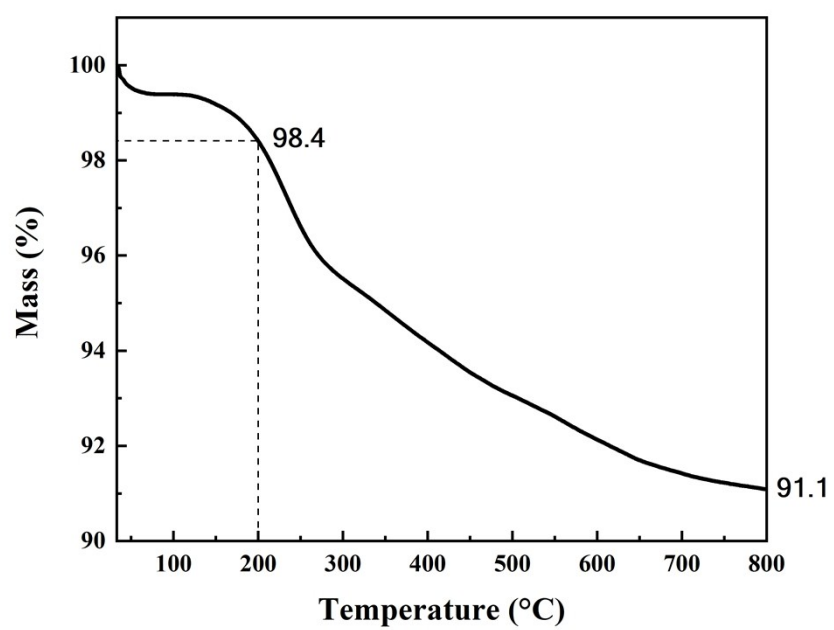

**Figure S4.** Thermal gravimetric (TG) curve of CPDs/SiO<sub>2</sub> Ms.

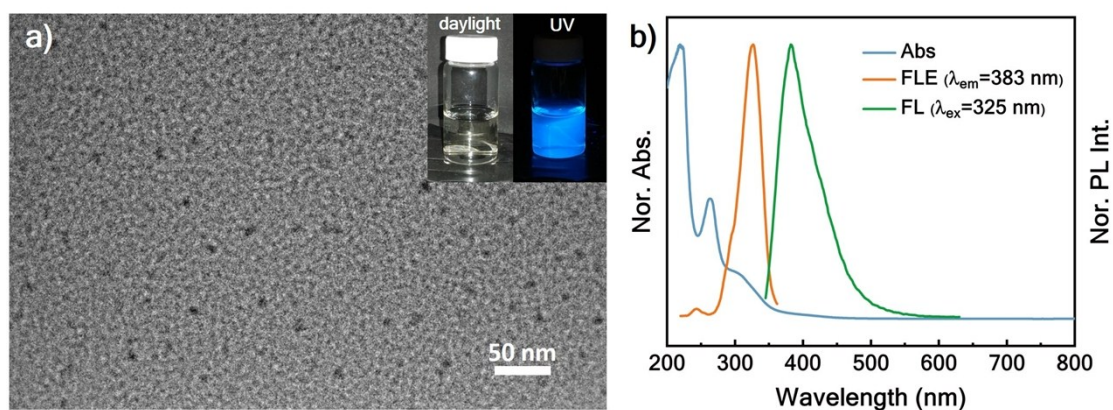

**Figure S5.** a) TEM image of EDA-CPDs. The insets were optical images of EDA-CPDs water solution under daylight and 365 nm UV light, respectively. b) The UV/Vis absorbance (blue line), FL excitation (orange line) and emission (green line) spectra of the EDA-CPDs water solution.

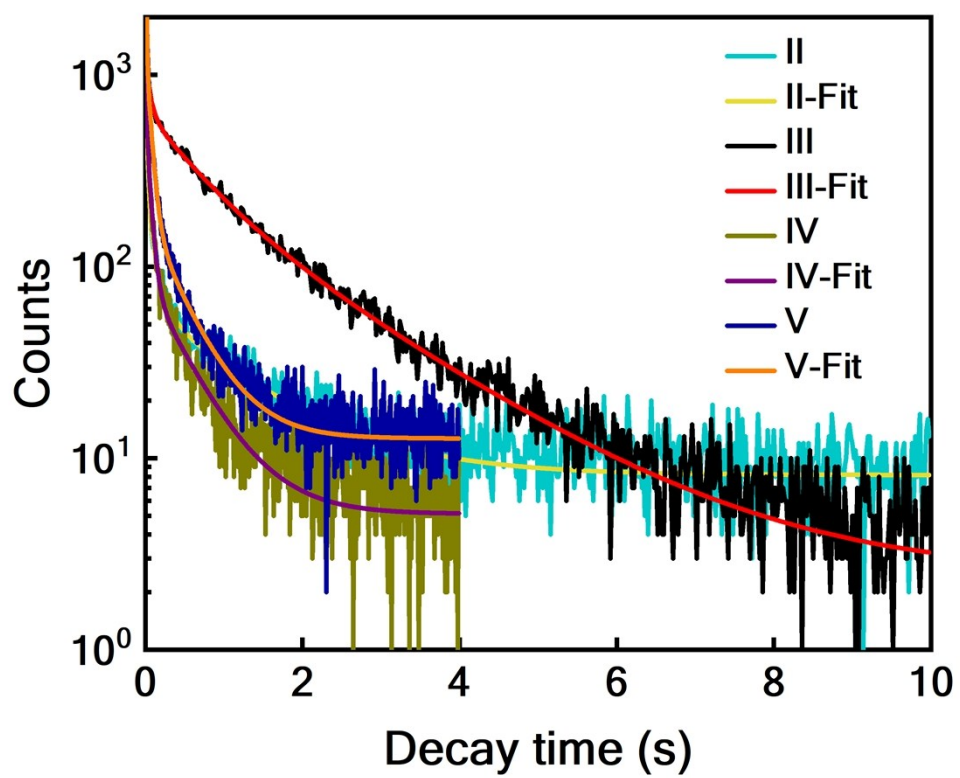

**Figure S6.** The PL decay spectra of sample II-V.

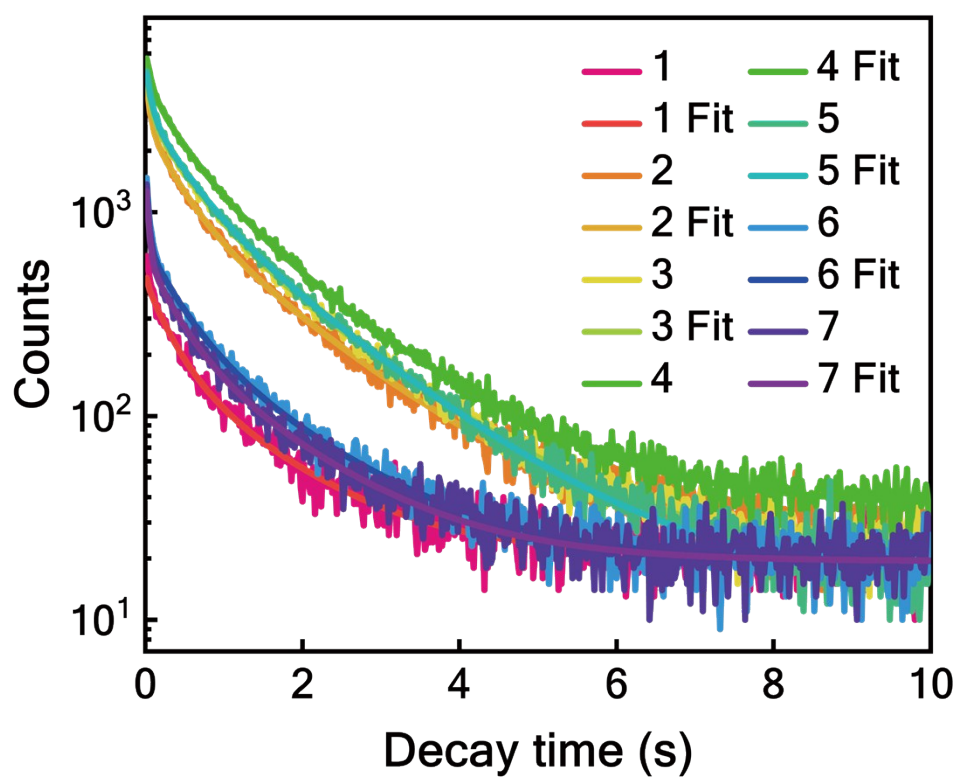

**Figure S7.** The PL decay spectra and fitting curves of sample 1-7.

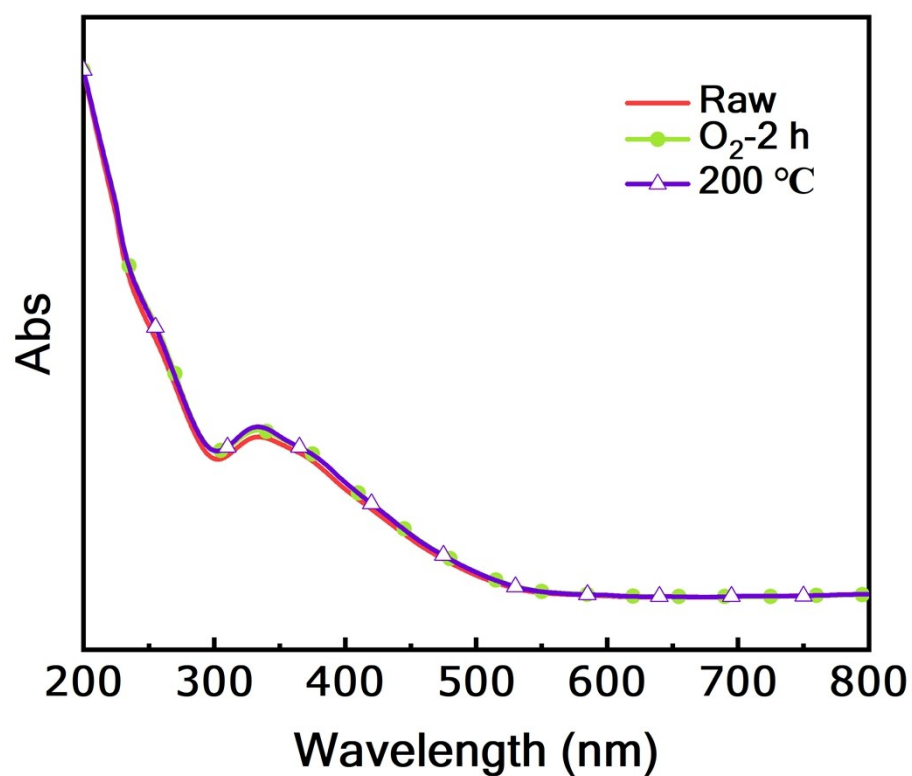

**Figure S8.** The UV/Vis absorbance spectra of the CPDs/SiO<sub>2</sub> Ms under ambient condition (red solid line, named Raw), after 2h oxygen treatment (green dots line, named O<sub>2</sub>-2 h) and after heat treatment at 200 °C for 10 minutes and continuous cooling to room temperature (purple triangle line, named 200 °C).

**Table S1.** RTP lifetime of samples synthesized by TEOS and EDA analogues.

| Sample     | Structural Formula                                                                | RTP Lifetime  |
|------------|-----------------------------------------------------------------------------------|---------------|
| <b>I</b>   | 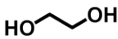 | <b>No RTP</b> |
| <b>II</b>  |  | <b>0.78 s</b> |
| <b>III</b> |  | <b>1.26 s</b> |
| <b>IV</b>  |  | <b>0.20 s</b> |
| <b>V</b>   |  | <b>0.14 s</b> |

**Table S2.** Lifetime fitting parameters of sample II - V .

| Sample     | $\tau_1$ (s) | $\tau_2$ (s) | $\tau_3$ (s) | $p_1$ (%) | $p_2$ (%) | $p_3$ (%) | $\chi^2$ | $\tau_{avg}$ (s) |
|------------|--------------|--------------|--------------|-----------|-----------|-----------|----------|------------------|
| <b>II</b>  | 0.02         | 0.11         | 1.16         | 15.12     | 19.79     | 65.09     | 1.393    | 0.78             |
| <b>III</b> | 0.06         | 0.63         | 1.68         | 4.32      | 33.21     | 62.47     | 1.204    | 1.26             |
| <b>IV</b>  | 0.006        | 0.05         | 0.51         | 38.33     | 26.35     | 35.32     | 1.565    | 0.20             |
| <b>V</b>   | 0.007        | 0.06         | 0.40         | 37.1      | 31.36     | 31.53     | 1.460    | 0.16             |

**Table S3.** List of the raw materials and RTP lifetime of our RTP materials which were prepared with different molar ratio of TEOS: EDA.

| <b>Sample</b>                    | <b>1</b>    | <b>2</b>    | <b>3</b>    | <b>4</b>    | <b>5</b>    | <b>6</b>    | <b>7</b>    |
|----------------------------------|-------------|-------------|-------------|-------------|-------------|-------------|-------------|
| <b>H<sub>2</sub>O / mL</b>       | 30          | 30          | 30          | 10          | 10          | 10          | 10          |
| <b>TEOS / mmol</b>               | 30          | 30          | 30          | 10          | 10          | 10          | 10          |
| <b>EDA / mmol</b>                | 3           | 6           | 15          | 10          | 20          | 50          | 100         |
| <b>Molar ratio<br/>TEOS: EDA</b> | <b>10:1</b> | <b>5:1</b>  | <b>2:1</b>  | <b>1:1</b>  | <b>1:2</b>  | <b>1:5</b>  | <b>1:10</b> |
| <b>RTP lifetime / s</b>          | <b>0.96</b> | <b>1.08</b> | <b>1.11</b> | <b>1.20</b> | <b>1.13</b> | <b>1.02</b> | <b>0.95</b> |
